# Supplementary material for: Pseudomonas 2.0: genetic upgrading of P. putida KT2440 as an enhanced host for heterologous gene expression
Source: PubMed Central journal article supplement (PMC4230525; doi:10.1186/s12934-014-0159-3), 2014-11-11
Supplement: 12934_2014_159_MOESM1_ESM.pdf [file 12934_2014_159_MOESM1_ESM.pdf]

## ADDITIONAL FILE 1

**Table S1.** Genomic coordinates of the eleven deletions introduced in *Pseudomonas putida* KT2440 to construct the streamlined strain EM383.

| Deletion <sup>a</sup> | Gene or gene cluster | Number of genes targeted | Coordinates deleted (bp) |           | Extension of the deletion (bp) |
|-----------------------|----------------------|--------------------------|--------------------------|-----------|--------------------------------|
|                       |                      |                          | Start                    | End       |                                |
| 1                     | Prophage 1           | 72                       | 4,372,649                | 4,427,414 | 54,766                         |
| 2                     | Prophage 4           | 41                       | 1,738,082                | 1,778,140 | 40,059                         |
| 3                     | Prophage 3           | 32                       | 2,586,633                | 2,625,819 | 39,187                         |
| 4                     | Prophage 2           | 55                       | 3,412,988                | 3,448,599 | 35,612                         |
| 5                     | Tn7 transposase      | 4                        | 6,161,914                | 6,168,509 | 6,596                          |
| 6                     | <i>endA-1</i>        | 1                        | 2,798,042                | 2,798,734 | 693                            |
| 7                     | <i>endA-2</i>        | 1                        | 3,819,907                | 3,820,872 | 966                            |
| 8                     | <i>hsdRMS</i>        | 3                        | 5,393,057                | 5,398,717 | 5,661                          |
| 9                     | Flagellum            | 69                       | 4,919,154                | 4,988,328 | 69,175                         |
| 10                    | Tn4652               | 21                       | 3,366,692                | 3,382,468 | 15,777                         |
| 11                    | <i>recA</i>          | 1                        | 1,827,143                | 1,828,210 | 1,068                          |

<sup>a</sup> The deletion number identifies the order in which the specific gene or gene cluster was deleted. The information regarding genomic coordinates of each locus was derived from the reported sequence of *P. putida* KT2440 [1].

**Table S2.** Oligonucleotides used in this study.

| Name                                 | Sequence (5' → 3') <sup>a</sup>                   | Use                                             |
|--------------------------------------|---------------------------------------------------|-------------------------------------------------|
| TS1( <i>endA1</i> ) <i>Xma</i> I-F   | TCCCC <b>CCCGGG</b> GCTTGTGTCAGGCGCCGTTTC         | Deletion of <i>endA-1</i>                       |
| TS1( <i>endA1</i> )-R                | CCGAAGGAAGATTGACTGCGCTCCTCAGGCCA<br>GCGTTTGTAAAG  | Deletion of <i>endA-1</i>                       |
| TS2( <i>endA1</i> )-F                | GCGCAGTCAATCTTCCTTCGG                             | Deletion of <i>endA-1</i>                       |
| TS2( <i>endA1</i> ) <i>Bam</i> HI-R  | CG <b>GGATC</b> CAGCAAAGAGCTGCAGCGGATC<br>TTC     | Deletion of <i>endA-1</i>                       |
| TS1( <i>endA2</i> ) <i>Eco</i> RI-F  | CG <b>GAATTC</b> CGGGGGTTGAGCATTACCCGCTT          | Deletion of <i>endA-2</i>                       |
| TS1( <i>endA2</i> )-R                | GGCCGCGCAGCCTTTGAAACGGGGGAAAAC<br>ATATTTCAAGTTG   | Deletion of <i>endA-2</i>                       |
| TS2( <i>endA2</i> )-F                | CCGTTTCAAAGGCTGCGCGGCC                            | Deletion of <i>endA-2</i>                       |
| TS2( <i>endA2</i> ) <i>Bam</i> HI-R  | CG <b>GGATCC</b> GCATGCGCGTGTGTATCACAGC           | Deletion of <i>endA-2</i>                       |
| TS1( <i>hsdRMS</i> ) <i>Eco</i> RI-F | GC <b>GAATTC</b> GTTTCGTCGACTGGATGGAGC            | Deletion of <i>hsdRMS</i>                       |
| TS1( <i>hsdRMS</i> )-R               | TCAGGCGCATAACGAATTTCTGCTGGCTATGT<br>CCCTATGG      | Deletion of <i>hsdRMS</i>                       |
| TS2( <i>hsdRMS</i> )-F               | GAAATTCGTTATGCGCCTGA                              | Deletion of <i>hsdRMS</i>                       |
| TS2( <i>hsdRMS</i> ) <i>Bam</i> HI-R | CG <b>GGATCC</b> TTGTCTGGCTTTTGCATCAG             | Deletion of <i>hsdRMS</i>                       |
| TS1(Tn4652) <i>Xma</i> I-F           | TCCCC <b>CCCGGG</b> CCGTTCTGGCCAATGCC<br>GGGCA    | Deletion of Tn4652                              |
| TS1(Tn4652)-R                        | GTCCATTTTGCCGTGCCCTGCTGCCCCAAGC<br>GAGGCAAAGC     | Deletion of Tn4652                              |
| TS2(Tn4652)-F                        | CAGCAGGGCACGGCAAATGGAC                            | Deletion of Tn4652                              |
| TS2(Tn4652) <i>Bam</i> HI-R          | CG <b>GGATCC</b> ATGAAGGAATTCGTTTGGTGCAAG         | Deletion of Tn4652                              |
| TS1(Tn7) <i>Eco</i> RI-F             | CG <b>GAATTC</b> CCAGAACGGGTGCTAGCTGC             | Deletion of Tn7                                 |
| TS1(Tn7)-R                           | GTCCAGCTTGGCTTTCAAATCAG                           | Deletion of Tn7                                 |
| TS2(Tn7)-F                           | CTGATTTGAAAGCCAAGCTGGACATTTTAAACG<br>ATTGACTGTTAC | Deletion of Tn7                                 |
| TS2(Tn7)- <i>Xma</i> I-R             | TCCCC <b>CCCGGG</b> GCTCCGAGACCGCCGACCAAGA        | Deletion of Tn7                                 |
| 3864F                                | ACTTGTACACCCGTGGTTCCG                             | Diagnose deletion of<br>prophage 1 <sup>b</sup> |
| 3864R                                | TGAACCAGCGTTCGATACTG                              | Diagnose deletion of<br>prophage 1 <sup>b</sup> |
| 3065F                                | GTCGACGAGGTGGAATTGAG                              | Diagnose deletion of<br>prophage 2 <sup>b</sup> |
| 3065R                                | GCAGAGGTTTTGTTGGGGTA                              | Diagnose deletion of<br>prophage 2 <sup>b</sup> |
| 2277F                                | GCAGATCGAGGACTTCAAGC                              | Diagnose deletion of<br>prophage 3 <sup>b</sup> |
| 2277R                                | GCACTCCATAGCACCTAGC                               | Diagnose deletion of<br>prophage 3 <sup>b</sup> |
| 1565F                                | CTGACCGAGGATCAGATGGT                              | Diagnose deletion of<br>prophage 4 <sup>b</sup> |
| 1565R                                | CCGGGTTGAACTTCACGTAG                              | Diagnose deletion of<br>prophage 4 <sup>b</sup> |
| 5406F                                | CATCTCCTTTCCAACCCAGA                              | Diagnose deletion of<br>Tn7                     |
| 5406R                                | CGTGCATACCAAACAACAGG                              | Diagnose deletion of                            |

|                                    |                                        |                                                         |
|------------------------------------|----------------------------------------|---------------------------------------------------------|
|                                    |                                        | Tn7                                                     |
| 4335F                              | TACCGAGGAACACGAAAACC                   | Diagnose deletion of the flagellum <sup>c</sup>         |
| 4335R                              | TTGGCAGGTTGTCAGTGAAG                   | Diagnose deletion of the flagellum <sup>c</sup>         |
| 4741F                              | CTCGACCAGTCACCGAATTT                   | Diagnose deletion of <i>hsdRMS</i>                      |
| 4741R                              | ACGATGGTGTGCAGGTTACA                   | Diagnose deletion of <i>hsdRMS</i>                      |
| 2968F                              | GTGCTCCGATAGCGGCGGCAGCA                | Diagnose deletion of Tn4652                             |
| 2968R                              | GGGCGCATCGAACTGTCGATCTTC               | Diagnose deletion of Tn4652                             |
| <i>endA1</i> -F                    | CGCTTTTCGCAGCAGCCTGCCTG                | Diagnose deletion of <i>endA-1</i>                      |
| <i>endA1</i> -R                    | GAAGTAGGTGCGGGCGATCATGCC               | Diagnose deletion of <i>endA-1</i>                      |
| <i>endA2</i> -F                    | CAATGCCGGCGAATACGGCCAAT                | Diagnose deletion of <i>endA-2</i>                      |
| <i>endA2</i> -R                    | CAGGCCATCAGCAGCTGTTGCTG                | Diagnose deletion of <i>endA-2</i>                      |
| <i>recA</i> -F                     | CTACGGCCCGGAATCGTCGGGTA                | Diagnose deletion of <i>recA</i>                        |
| <i>recA</i> -R                     | GACCGCGCCGGTACGGCGGATGT                | Diagnose deletion of <i>recA</i>                        |
| TS1( <i>recA</i> ) <i>EcoRI</i> -F | <b>CGGAATTC</b> CGGTGGTGGCATTGCCGAAGC  | Diagnose deletion of <i>recA</i> (TS1-TS2) <sup>b</sup> |
| TS2( <i>recA</i> ) <i>BamHI</i> -R | CG <b>GGATCC</b> TTCGAGCTTCAATAATCGTCG | Diagnose deletion of <i>recA</i> (TS1-TS2) <sup>b</sup> |
| <i>endA-1</i> -junction-F          | CGTGAAGAAGCGCAGGCGCGC                  | Sequence boundaries of <i>endA-1</i> deletion           |
| <i>endA-1</i> -junction-R          | GTAATGCCGAACAGCCGGATGA                 | Sequence boundaries of <i>endA-1</i> deletion           |
| <i>endA-2</i> -junction-F          | CCGCTGAGTTTCAGCCTGGC                   | Sequence boundaries of <i>endA-2</i> deletion           |
| <i>endA-2</i> -junction-R          | GGCAGGCCAACCTGGGGCCGGCG                | Sequence boundaries of <i>endA-2</i> deletion           |
| Tn4652-junction-F                  | GTCTCGCGCCTTTATCCTTCA                  | Sequence boundaries of Tn4652 deletion                  |
| Tn4652-junction-R                  | GTGACCGGCGCCACATAGAGGC                 | Sequence boundaries of Tn4652 deletion                  |
| <i>hsdRMS</i> -junction-F          | AATACTATAGTTTCAGTTCCC                  | Sequence boundaries of <i>hsdRMS</i> deletion           |
| <i>hsdRMS</i> -junction-R          | CTTAAGTTCAAGTTTTACAACG                 | Sequence boundaries of <i>hsdRMS</i> deletion           |
| Tn7-junction-F                     | CCGACCTGGGAAGGTCGACTTT                 | Sequence boundaries of Tn7 deletion                     |
| Tn7-junction-R                     | GATGACTTCTAGGCCATTACTTA                | Sequence boundaries of Tn7 deletion                     |

|                         |                            |                                                        |
|-------------------------|----------------------------|--------------------------------------------------------|
| <i>recA</i> -junction-F | CTCAAGGAGCACCCACATGG       | Sequence boundaries of <i>recA</i> deletion            |
| <i>recA</i> -junction-R | GCTACCGCATTGCGGGTGA        | Sequence boundaries of <i>recA</i> deletion            |
| Junction-Flagella-F     | CGCCAAGCCTCGCTACCCGGCCTGCT | Sequence boundaries of flagellum deletion <sup>c</sup> |
| Junction-Flagella-R     | CAGTTGATTCTGGTGGTGCACCCG   | Sequence boundaries of flagellum deletion <sup>c</sup> |
| pEMG-F1                 | CCATTCAGGCTGCGCAACTGTTG    | Sequence TS1-TS2 in pEMG <sup>d</sup>                  |
| pEMG-R1                 | CTTTACACTTTATGCTTCCGGC     | Sequence TS1-TS2 in pEMG <sup>d</sup>                  |
| pSW-F                   | GGACGCTTCGCTGAAAATA        | Diagnose curation of the plasmid pSW-I <sup>d</sup>    |
| pSW-R                   | AACGTCGTGACTGGGAAAAC       | Diagnose curation of the plasmid pSW-I <sup>d</sup>    |

<sup>a</sup> Recognition site for the restriction enzymes specified are indicated in boldface in the DNA sequence, and complementary sequences used in splicing by overlap extension (SOEing) PCR amplifications are shown in italics.

<sup>b</sup> Taken from Martínez-García *et al.* [2].

<sup>c</sup> Taken from Martínez-García *et al.* [3].

<sup>d</sup> Taken from Martínez-García and de Lorenzo [4].

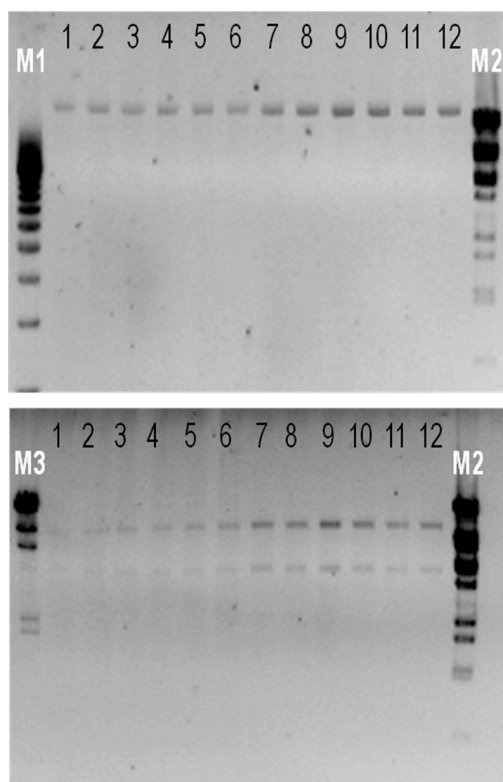

**Figure S1. Evaluation of the streamlined strain as a host for heterologous plasmid DNA.** **Top panel:** Gel electrophoresis analysis of six independent plasmid DNA purifications from saturated LB cultures of either the wild-type *P. putida* strain KT2440 (lanes 1 to 6) or *P. putida* strain EM383 (lanes 7 to 12) run on an 1% (w/v) agarose gel and visualized under ultraviolet light after staining with ethidium bromide. **Bottom panel:** Gel electrophoresis analysis of the *PshAI*-digested plasmids obtained from the wild-type strain KT2440 (lanes 1 to 6) or strain EM383 (lanes 7 to 12) as explained above, and run on an 1% (w/v) agarose gel. Flanking lanes in both gels correspond to different DNA size markers [M1, 500-bp Molecular Ruler EZ Load™ (Bio-Rad, Berkeley, CA, USA); M2,  $\lambda$  DNA digested with *BstEII*; and M3,  $\lambda$  DNA digested with *HindIII*]. Plasmid DNA purification and analysis was conducted following routinely procedures as described elsewhere [5].

## References

1. Winsor GL, Lam DK, Fleming L, Lo R, Whiteside MD, Yu NY, Hancock RE, Brinkman FS: ***Pseudomonas* Genome Database: improved comparative analysis and population genomics capability for *Pseudomonas* genomes.** *Nucleic Acids Res* 2011, **39**:D596-D600.
2. Martínez-García E, Jatsenko T, Kivisaar M, de Lorenzo V: **Freeing *Pseudomonas putida* KT2440 of its proviral load strengthens endurance to environmental stresses.** *Environ Microbiol* 2014, **In press**, DOI: 10.1111/1462-2920.12492.
3. Martínez-García E, Nikel PI, Chavarría M, de Lorenzo V: **The metabolic cost of flagellar motion in *Pseudomonas putida* KT2440.** *Environ Microbiol* 2014, **16**:291-303.
4. Martínez-García E, de Lorenzo V: **Engineering multiple genomic deletions in Gram-negative bacteria: analysis of the multi-resistant antibiotic profile of *Pseudomonas putida* KT2440.** *Environ Microbiol* 2011, **13**:2702-2716.
5. Sambrook J, Maniatis T, Fritsch EF: *Molecular cloning: A laboratory manual*. Cold Spring Harbor, N.Y.: Cold Spring Harbor Laboratory Press; 1989.
